# Supplementary material for: The Phenome-wide Consequences of Anorexia Nervosa Genes
Source: medRxiv preprint, doi:10.1101/2021.02.12.21250941, version 2 (2021-03-13)
Supplement: Supplemental Author List [file 250941_file10.docx]

**Eating Disorders Working Group of the Psychiatric Genomics Consortium**

Roger A. H. Adan1-3, Lars Alfredsson4, Tetsuya Ando5, Ole A. Andreassen6, Harald Aschauer7, Jessica H. Baker8, Vladimir Bencko9, Andrew W. Bergen10,11, Wade H. Berrettini12, Andreas Birgegård13, Joseph M. Boden14, Ilka Boehm15, Vesna Boraska Perica16,17, Harry Brandt18, Gerome Breen19,20, Julien Bryois13, Cynthia M. Bulik8,13, 21, Roland Burghardt22, Laura Carlberg23, Matteo Cassina24, Sven Cichon25-27, Maurizio Clementi24, Jonathan R. I. Coleman19,20, Roger D. Cone28, Philippe Courtet29, Steven Crawford18, Scott Crow30, James J. Crowley31,32, Unna N. Danner2, Oliver S. P. Davis33-35, Martina deZwaan36, George Dedoussis37, Daniela Degortes38, Janiece E. DeSocio39, Danielle M. Dick40-42, Dimitris Dikeos43, Christian Dina44, Monika Dmitrzak-Weglarz45, Elisa Docampo46-48, Laramie E. Duncan49, Philibert Duriez50,51, Karin Egberts52, Stefan Ehrlich15, Geòrgia Escaramís46-48, Tõnu Esko53,54, Thomas Espeseth55,56, Xavier Estivill46-48,57, Anne Farmer19, Angela Favaro38, Fernando Fernández-Aranda58,59, Manfred M. Fichter60,61, Krista Fischer53, James A. B. Floyd62, Manuel Föcker63, Lenka Foretova64, Andreas J. Forstner27,65,66, Monica Forzan24, Christopher S. Franklin16, Steven Gallinger67, Giovanni Gambaro68, Héléna A. Gaspar19,20, Ina Giegling69, Paola Giusti-Rodríquez31, Fragiskos Gonidakis43, Scott Gordon70, Philip Gorwood50,51, Monica Gratacos Mayora46-48, Jakob Grove71-74, Sébastien Guillaume29, Yiran Guo75, Hakon Hakonarson75,76, Katherine A. Halmi77, Ken B. Hanscombe19, Konstantinos Hatzikotoulas16,78, Joanna Hauser79, Johannes Hebebrand80, Sietske G. Helder19,81, Anjali Henders82, Stefan Herms25,26, Beate Herpertz-Dahlmann83, Wolfgang Herzog84, Anke Hinney80, L. John Horwood14, Christopher Hübel19,85, Laura M. Huckins86-89, James I. Hudson90, Hartmut Imgart91, Hidetoshi Inoko92, Vladimir Janout93, Susana Jiménez-Murcia58,59, Craig Johnson94, Jessica S. Johnson86,87, Jennifer Jordan95,96, Antonio Julià97, Gursharan Kalsi19, Deborah Kaminská98, Allan S. Kaplan99-101, Jaakko Kaprio102, Leila Karhunen103, Andreas Karwautz104, Martien J. H. Kas1,105, Walter H. Kaye106, James L. Kennedy99-101, Martin A. Kennedy107, Anna Keski-Rahkonen108, Kirsty Kiezebrink109, Youl-Ri Kim110, Katherine M. Kirk111, Lars Klareskog112, Kelly L. Klump113, Gun Peggy S. Knudsen114, Maria C. La Via8, Mikael Landén13,115, Janne T. Larsen72,85,116, Stephanie Le Hellard117,118, Virpi M. Leppä13, Dong Li75, Paul Lichtenstein13, Lisa Lilenfeld119, Bochao Danae Lin1, Jolanta Lissowska120, Astri J. Lundervold121, Jurjen Luykx1, Pierre J. Magistretti122-123, Sarah L. Maguire194, Mario Maj124, Katrin Mannik53,125, Sara Marsal97, Christian R. Marshall126, Nicholas G. Martin70, Manuel Mattheisen32,71,127,128, Morten Mattingsdal6, Sara McDevitt129,130, Peter McGuffin19, Sarah E. Medland111, Andres Metspalu53,131, Ingrid Meulenbelt132, Nadia Micali133,134, James Mitchell135, Karen Mitchell136,137, Alessio Maria Monteleone124, Palmiero Monteleone138, Grant W. Montgomery82,111,139, Preben Bo Mortensen72,85,116, Melissa A. Munn-Chernoff8, Benedetta Nacmias140,141, Marie Navratilova64, Ioanna Ntalla37, Catherine M. Olsen142, Roel A. Ophoff143,144, Julie O’Toole145, Leonid Padyukov112, Aarno Palotie54,102,146, Jacques Pantel147, Hana Papezova98, Richard Parker111, John F. Pearson148, Nancy L. Pedersen13, Triinu Peters80, Liselotte V. Petersen72,85,116, Dalila Pinto87, Kirstin L. Purves19, Anu Raevuori108,149, Nicolas Ramoz51, Ted Reichborn-Kjennerud114,150, Valdo Ricca151, Samuli Ripatti152, Stephan Ripke153-155, Marion Roberts19, Alessandro Rotondo156, Dan Rujescu69, Filip Rybakowski157, Paolo Santonastaso158, André Scherag159, Stephen W. Scherer160,161, Ulrike Schmidt162, Nicholas J. Schork163, Alexandra Schosser164, Jochen Seitz83, Lenka Slachtova165, P. Eline Slagboom132, Margarita C. T. Slof-Op’t Landt166,167, Agnieszka Slopien168, Nicole Soranzo16,169-171, Sandro Sorbi140,141, Lorraine Southam16,78, Vidar W. Steen172,173, Michael Strober174,175, Garret D. Stuber8,176, Patrick F. Sullivan8,13,31, Beata Świątkowska177, Jin P. Szatkiewicz31, Ioanna Tachmazidou16, Friederike I. Tam15,178, Elena Tenconi38, Laura M. Thornton8, Alfonso Tortorella179, Federica Tozzi180, Janet Treasure19, Artemis Tsitsika181, Marta Tyszkiewicz-Nwafor168, Konstantinos Tziouvas182, Annemarie van Elburg2,183, Eric F. van Furth166,167, Tracey D. Wade184, Gudrun Wagner104, Esther Walton15, Hunna J. Watson8,185,186, Thomas Werge187, David C. Whiteman142, H-Erich Wichmann188, Elisabeth Widen102, D. Blake Woodside100,101,189,190, Jiayi Xu86, Shuyang Yao13, Zeynep Yilmaz8,13,31,85, Eleftheria Zeggini16,78,191, Stephanie Zerwas8, Stephan Zipfel192,193.

1Brain Center Rudolf Magnus, Department of Translational Neuroscience, University Medical Center Utrecht, Utrecht, The Netherlands.2Center for Eating Disorders Rintveld, Altrecht Mental Health Institute, Zeist, The Netherlands.3Sahlgrenska Academy, University of Gothenburg, Gothenburg, Sweden.4Institute of Environmental Medicine, Karolinska Institutet, Stockholm, Sweden. 5Department of Behavioral Medicine, National Institute of Mental Health, National Center of Neurology and Psychiatry, Kodaira, Tokyo, Japan. 6NORMENT KG Jebsen Centre, Division of Mental Health and Addiction, University of Oslo, Oslo University Hospital, Oslo, Norway.7Biopsychosocial Corporation, Vienna, Austria. 8Department of Psychiatry, University of North Carolina at Chapel Hill, Chapel Hill, North Carolina, USA. 9First Faculty of Medicine, Institute of Hygiene and Epidemiology, Charles University, Prague, Czech Republic.10BioRealm, LLC, Walnut, California, USA. 11Oregon Research Institute, Eugene, Oregon, USA.12Department of Psychiatry, Center for Neurobiology and Behavior, University of Pennsylvania Perelman School of Medicine, Philadelphia, Pennsylvania, USA.13Department of Medical Epidemiology and Biostatistics, Karolinska Institutet, Stockholm, Sweden.14Christchurch Health and Development Study, University of Otago, Christchurch, New Zealand.15Division of Psychological and Social Medicine and Developmental Neurosciences, Faculty of Medicine, Technische Universität Dresden, Dresden, Germany.16Wellcome Sanger Institute, Wellcome Genome Campus, Hinxton, Cambridge, UK.17Department of Medical Biology, School of Medicine, University of Split, Split, Croatia.18The Center for Eating Disorders at Sheppard Pratt, Baltimore, Maryland, USA.19Institute of Psychiatry, Psychology and Neuroscience, Social, Genetic and Developmental Psychiatry (SGDP) Centre, King’s College London, London, UK.20National Institute for Health Research Biomedical Research Centre, King’s College London and South London and Maudsley National Health Service Trust, London, UK.21Department of Nutrition, University of North Carolina at Chapel Hill, Chapel Hill, North Carolina, USA.22Klinikum Frankfurt/Oder, Frankfurt, Germany.23Medical University of Vienna, Vienna, Austria.24Clinical Genetics Unit, Department of Woman and Child Health, University of Padova, Padova, Italy.25Institute of Medical Genetics and Pathology, University Hospital Basel, Basel, Switzerland.26Department of Biomedicine, University of Basel, Basel, Switzerland.27Institute of Neuroscience and Medicine (INM-1), Research Center Juelich, Juelich, Germany.28Life Sciences Institute and Department of Molecular and Integrative Physiology, University of Michigan, Ann Arbor, Michigan, USA.29Department of Emergency Psychiatry and Post-Acute Care, CHRU Montpellier, University of Montpellier, Montpellier, France.30Department of Psychiatry, University of Minnesota, Minneapolis, Minnesota, USA.31Department of Genetics, University of North Carolina at Chapel Hill, Chapel Hill, North Carolina, USA.32Department of Clinical Neuroscience, Karolinska Institutet, Stockholm, Sweden.33MRC Integrative Epidemiology Unit, University of Bristol, Bristol, UK.34Bristol Medical School, University of Bristol, Bristol, UK.35The Alan Turing Institute, London, UK.36Department of Psychosomatic Medicine and Psychotherapy, Hannover Medical School, Hannover, Germany.37Department of Nutrition and Dietetics, Harokopio University, Athens, Greece.38Department of Neurosciences, University of Padova, Padova, Italy.39College of Nursing, Seattle University, Seattle, Washington, USA.40Department of Psychology, Virginia Commonwealth University, Richmond, Virginia, USA.41College Behavioral and Emotional Health Institute, Virginia Commonwealth University, Richmond, Virginia, USA.42Department of Human and Molecular Genetics, Virginia Commonwealth University, Richmond, Virginia, USA.43First Department of Psychiatry, National and Kapodistrian University of Athens, Medical School, Eginition Hospital, Athens, Greece.44L’institut du thorax, INSERM, CNRS, UNIV Nantes, Nantes, France.45Department of Psychiatric Genetics, Poznan University of Medical Sciences, Poznan, Poland.46Barcelona Institute of Science and Technology, Barcelona, Spain.47Universitat Pompeu Fabra, Barcelona, Spain.48Centro de Investigación Biomédica en Red en Epidemiología y Salud Pública (CIBERESP), Barcelona, Spain.49Department of Psychiatry and Behavioral Sciences, Stanford University, Stanford, California, USA.50GHU Paris Psychiatrie et Neurosciences, CMME, Paris Descartes University, Paris, France.51INSERM U1266, Institute of Psychiatry and Neurosciences, Paris, France.52Department of Child and Adolescent Psychiatry, Psychosomatics and Psychotherapy, University Hospital of Würzburg, Centre for Mental Health, Würzburg, Germany.53Estonian Genome Center, University of Tartu, Tartu, Estonia.54Program in Medical and Population Genetics, Broad Institute of Massachusetts Institute of Technology and Harvard University, Cambridge, Massachusetts, USA.55Department of Psychology, University of Oslo, Oslo, Norway.56Bjørknes College, Oslo, Norway.57Genomics and Disease, Bioinformatics and Genomics Programme, Centre for Genomic Regulation, Barcelona, Spain.58Department of Psychiatry, University Hospital of Bellvitge – IDIBELL and CIBERobn, Barcelona, Spain.59Department of Clinical Sciences, School of Medicine, University of Barcelona, Barcelona, Spain.60Department of Psychiatry and Psychotherapy, Ludwig-Maximilians-University (LMU), Munich, Germany.61Schön Klinik Roseneck affiliated with the Medical Faculty of the University of Munich, Munich, Germany.62Genomics plc, Genomics PLC, Oxford, UK.63Department of Child and Adolescent Psychiatry, University of Münster, Münster, Germany.64Department of Cancer, Epidemiology and Genetics, Masaryk Memorial Cancer Institute, Brno, Czech Republic.65Institute of Human Genetics, University of Bonn, School of Medicine and University Hospital Bonn, Bonn, Germany.66Centre for Human Genetics, University of Marburg, Marburg, Germany.67Department of Surgery, Faculty of Medicine, University of Toronto, Toronto, Ontario, Canada.68Division of Nephrology and Dialysis, Department of Medicine, AOVR, Ospedale Maggiore, Verona, Italy.69Department of Psychiatry, Psychotherapy and Psychosomatics, Martin Luther University of Halle-Wittenberg, Halle (Saale), Germany.70Genetics and Computational Biology Department, QIMR Berghofer Medical Research Institute, Brisbane, Queensland, Australia.71Department of Biomedicine, Aarhus University, Aarhus, Denmark.72The Lundbeck Foundation Initiative for Integrative Psychiatric Research (iPSYCH), Aarhus, Denmark.73Centre for Integrative Sequencing, iSEQ, Aarhus University, Aarhus, Denmark.74Bioinformatics Research Centre, Aarhus University, Aarhus, Denmark.75Center for Applied Genomics, Children’s Hospital of Philadelphia, Philadelphia, Pennsylvania, USA.76Department of Pediatrics, University of Pennsylvania Perelman School of Medicine, Philadelphia, Pennsylvania, USA.77Department of Psychiatry, Weill Cornell Medical College, New York, New York, USA.78Institute of Translational Genomics, Helmholtz Zentrum München – German Research Centre for Environmental Health, Neuherberg, Germany.79Department of Adult Psychiatry, Poznan University of Medical Sciences, Poznan, Poland.80Department of Child and Adolescent Psychiatry, University Hospital Essen, University of Duisburg-Essen, Essen, Germany.81Zorg op Orde, Delft, The Netherlands.82Institute for Molecular Bioscience, University of Queensland, Brisbane, Queensland, Australia.83Department of Child and Adolescent Psychiatry, Psychosomatics and Psychotherapy, RWTH Aachen University, Aachen, Germany.84Department of General Internal Medicine and Psychosomatics, Heidelberg University Hospital, Heidelberg University, Heidelberg, Germany.85National Centre for Register-Based Research, Aarhus BSS, Aarhus University, Aarhus, Denmark.86Pamela Sklar Division of Psychiatric Genomics, Icahn School of Medicine at Mount Sinai, New York, New York, USA.87Department of Psychiatry, and Genetics and Genomic Sciences, Icahn School of Medicine at Mount Sinai, New York, New York, USA.88Seaver Autism Center for Research and Treatment, Icahn School of Medicine at Mount Sinai, New York, New York, USA.89Mental Illness Research, Education and Clinical Centers, James J. Peters Department of Veterans Affairs Medical Center, Bronx, New York, USA.90Biological Psychiatry Laboratory, McLean Hospital/Harvard Medical School, Boston, Massachusetts, USA.91Eating Disorders Unit, Parklandklinik, Bad Wildungen, Germany.92Department of Molecular Life Science, Division of Basic Medical Science and Molecular Medicine, School of Medicine, Tokai University, Isehara, Japan.93Faculty of Health Sciences, Palacky University, Olomouc, Czech Republic.94Eating Recovery Center, Denver, Colorado, USA.95Department of Psychological Medicine, University of Otago, Christchurch, New Zealand.96Canterbury District Health Board, Christchurch, New Zealand.97Rheumatology Research Group, Vall d’Hebron Research Institute, Barcelona, Spain.98First Faculty of Medicine, Department of Psychiatry, Charles University, Prague, Czech Republic.99Centre for Addiction and Mental Health, Toronto, Ontario, Canada.100Institute of Medical Science, University of Toronto, Toronto, Ontario, Canada.101Department of Psychiatry, University of Toronto, Toronto, Ontario, Canada.102Institute for Molecular Medicine Finland FIMM, HiLIFE, Helsinki Institute of Life Science, University of Helsinki, Helsinki, Finland.103Institute of Public Health and Clinical Nutrition, Department of Clinical Nutrition, University of Eastern Finland, Kuopio, Finland.104Eating Disorders Unit, Department of Child and Adolescent Psychiatry, Medical University of Vienna, Vienna, Austria.105Groningen Institute for Evolutionary Life Sciences, University of Groningen, Groningen, The Netherlands.106Department of Psychiatry, University of California San Diego, San Diego, California, USA.107Department of Pathology and Biomedical Science, University of Otago, Christchurch, New Zealand.108Department of Public Health, University of Helsinki, Helsinki, Finland.109Institute of Applied Health Sciences, School of Medicine, Medical Sciences and Nutrition, University of Aberdeen, Aberdeen, UK.110Department of Psychiatry, Seoul Paik Hospital, Inje University, Seoul, Korea.111QIMR Berghofer Medical Research Institute, Brisbane, Queensland, Australia.112Division of Rheumatology, Department of Medicine, Center for Molecular Medicine, Karolinska Institutet and Karolinska University Hospital, Stockholm, Sweden.113Department of Psychology, Michigan State University, East Lansing, Michigan, USA.114Department of Mental Disorders, Norwegian Institute of Public Health, Oslo, Norway.115Department of Psychiatry and Neurochemistry, Institute of Neuroscience and Physiology, The Sahlgrenska Academy at the University of Gothenburg, Gothenburg, Sweden.116Centre for Integrated Register-based Research (CIRRAU), Aarhus University, Aarhus, Denmark.117Dr. Einar Martens Research Group for Biological Psychiatry, Center for Medical Genetics and Molecular Medicine, Haukeland University Hospital, Bergen, Norway.118Department of Clinical Medicine, Laboratory Building, Haukeland University Hospital, Bergen, Norway.119The Chicago School of Professional Psychology, Washington D.C., USA.120Department of Cancer Epidemiology and Prevention, M. Sklodowska-Curie National Research Institute of Oncology, Warsaw, Poland.121Department of Biological and Medical Psychology, University of Bergen, Bergen, Norway.122BESE Division, KAUST, KSA, King Abdullah University of Science and Technology, Thuwal, Saudi Arabia.123Department of Psychiatry, University of Lausanne-University Hospital of Lausanne (UNIL-CHUV), Lausanne, Switzerland.124Department of Psychiatry, University of Campania “Luigi Vanvitelli”, Naples, Italy.125Center for Integrative Genomics, University of Lausanne, Lausanne, Switzerland.126Department of Paediatric Laboratory Medicine, Division of Genome Diagnostics, The Hospital for Sick Children, Toronto, Ontario, Canada.127Center for Psychiatry Research, Stockholm Health Care Services, Stockholm City Council, Stockholm, Sweden.128Department of Psychiatry, Psychosomatics and Psychotherapy, University of Würzburg, Würzburg, Germany.129Department of Psychiatry, University College Cork, Cork, Ireland.130Child and Adolescent Regional Eating Disorder Service (CAREDS), Health Service Executive South, Cork, Ireland.131Institute of Molecular and Cell Biology, University of Tartu, Tartu, Estonia.132Molecular Epidemiology Section, Department of Biomedical Datasciences, Leiden University Medical Centre, Leiden, The Netherlands.133Department of Psychiatry, Faculty of Medicine, University of Geneva, Geneva, Switzerland.134Department of Pediatrics, Gynaecology and Obstetrics, University of Geneva, Geneva, Switzerland.135Department of Psychiatry and Behavioral Science, University of North Dakota School of Medicine and Health Sciences, Fargo, North Dakota, USA.136National Center for PTSD, VA Boston Healthcare System, Boston, Massachusetts, USA.137Department of Psychiatry, Boston University School of Medicine, Boston, Massachusetts, USA.138Department of Medicine, Surgery and Dentistry “Scuola Medica Salernitana”, University of Salerno, Salerno, Italy.139Queensland Brain Institute, University of Queensland, Brisbane, Queensland, Australia.140Department of Neuroscience, Psychology, Drug Research and Child Health (NEUROFARBA), University of Florence, Florence, Italy.141IRCCS Fondazione Don Carlo Gnocchi, Florence, Italy.142Population Health Department, QIMR Berghofer Medical Research Institute, Brisbane, Queensland, Australia.143Center for Neurobehavioral Genetics, Semel Institute for Neuroscience and Human Behavior, University of California Los Angeles, Los Angeles, California, USA.144Department of Psychiatry, Erasmus MC, University Medical Center Rotterdam, Rotterdam, The Netherlands.145Kartini Clinic, Portland, Oregon, USA.146Center for Human Genome Research, Massachusetts General Hospital, Boston, Massachusetts, USA.147INSERM U1124, Université de Paris, Paris, France.148Biostatistics and Computational Biology Unit, University of Otago, Christchurch, New Zealand.149Department of Adolescent Psychiatry, Helsinki University Hospital, Helsinki, Finland.150Institute of Clinical Medicine, University of Oslo, Oslo, Norway.151Department of Health Science, University of Florence, Florence, Italy.152Department of Biometry, University of Helsinki, Helsinki, Finland.153Analytic and Translational Genetics Unit, Department of Medicine, Massachusetts General Hospital and Harvard Medical School, Boston, Massachusetts, USA.154Stanley Center for Psychiatric Research, Broad Institute of the Massachusetts Institute of Technology and Harvard University, Cambridge, Massachusetts, USA.155Department of Psychiatry and Psychotherapy, Charité – Universitätsmedizin, Berlin, Germany.156Department of Psychiatry, Neurobiology, Pharmacology, and Biotechnologies, University of Pisa, Pisa, Italy.157Department of Psychiatry, Poznan University of Medical Sciences, Poznan, Poland.158Department of Neurosciences, Padua Neuroscience Center, University of Padova, Padova, Italy.159Institute of Medical Statistics, Computer and Data Sciences, Jena University Hospital, Jena, Germany.160Department of Genetics and Genomic Biology, The Hospital for Sick Children, Toronto, Ontario, Canada.161McLaughlin Centre, University of Toronto, Toronto, Ontario, Canada.162Institute of Psychiatry, Psychology and Neuroscience, Psychological Medicine, King’s College London, London, UK.163J. Craig Venter Institute (JCVI), La Jolla, California, USA.164Department of Psychiatry and Psychotherapy, Medical University of Vienna, Vienna, Austria.165First Faculty of Medicine, Department of Biology and Medical Genetics, Charles University, Prague, Czech Republic.166Center for Eating Disorders Ursula, Rivierduinen, Leiden, The Netherlands.167Department of Psychiatry, Leiden University Medical Centre, Leiden, The Netherlands.168Department of Child and Adolescent Psychiatry, Poznan University of Medical Sciences, Poznan, Poland.169Donor Health and Genomics, National Institute for Health Research Blood and Transplant Unit, Cambridge, UK.170Division of Cardiovascular Medicine, British Heart Foundation Centre of Excellence, Cambridge, UK.171Department of Haematology, University of Cambridge, Cambridge, UK.172Center for Medical Genetics and Molecular Medicine, Haukeland University Hospital, Bergen, Norway.173Department of Clinical Science, University of Bergen, Bergen, Norway.174Department of Psychiatry and Biobehavioral Science, Semel Institute for Neuroscience and Human Behavior, University of California Los Angeles, Los Angeles, California, USA.175David Geffen School of Medicine, University of California Los Angeles, Los Angeles, California, USA.176Department of Cell Biology and Physiology, University of North Carolina at Chapel Hill, Chapel Hill, North Carolina, USA.177Department of Environmental Epidemiology, Nofer Institute of Occupational Medicine, Lodz, Poland.178Eating Disorders Research and Treatment Center, Department of Child and Adolescent Psychiatry, Faculty of Medicine, Technische Universität Dresden, Dresden, Germany.179Department of Psychiatry, University of Perugia, Perugia, Italy.180Brain Sciences Department, Stremble Ventures, Limassol, Cyprus.181Adolescent Health Unit, Second Department of Pediatrics, “P. & A. Kyriakou” Children’s Hospital, University of Athens, Athens, Greece.182Pediatric Intensive Care Unit, “P. & A. Kyriakou” Children’s Hospital, University of Athens, Athens, Greece.183Faculty of Social and Behavioral Sciences, Utrecht University, Utrecht, The Netherlands.184School of Psychology, Flinders University, Adelaide, South Australia, Australia.185School of Psychology, Curtin University, Perth, Western Australia, Australia.186School of Paediatrics and Child Health, University of Western Australia, Perth, Western Australia, Australia.187Department of Clinical Medicine, University of Copenhagen, Copenhagen, Denmark.188Helmholtz Centre Munich – German Research Center for Environmental Health, Munich, Germany.189Centre for Mental Health, University Health Network, Toronto, Ontario, Canada.190Program for Eating Disorders, University Health Network, Toronto, Ontario, Canada.191TUM School of Medicine, Technical University of Munich and Klinikum Rechts der Isar, Munich, Germany.192Department of Internal Medicine VI, Psychosomatic Medicine and Psychotherapy, University Medical Hospital Tuebingen, Tuebingen, Germany.193Centre of Excellence for Eating Disorders (KOMET), University Tuebingen, Tuebingen, Germany. 194School of Medicine, InsideOut Institute, Sydney, New South Wales, Australia.
